# Supplementary material
Source: publisher site journal article supplement (https://www.dovepress.com/article/312393)
Supplement: Supplementary file 1 [file get_supplementary_file.php]

| **Supplementary File 1: Frequency of “don’t know or not applicable” answers on TANGO-GR in community-dwelling people and rehabilitation centre patients with nocturia** | | |
| --- | --- | --- |
| **Frequency of DK/NA, n (%)** | **Community-dwelling people, n = 371** | **Rehabilitation centre patients, n = 502** |
| 0 | 35 (94.6) | 30 (60.0) |
| 1 | 1 (2.7) | 16 (32.0) |
| 2 | 1 (2.7) | 3 (6.0) |
| ≥3 | 0 (0.0) | 1 (2.0) |
| Q18 (I have an enlarged prostate gland) was not included in the analysis of the answers | |  |
| 1 Q9 (2.7%); Q15 (2.7%); Q19 (2.7) |  |  |
| 2 Q2 (18%); Q3 (12%); Q6 (2%); Q7 (2%); Q8 (2%); Q11 (2%); Q13 (10%); Q19 (2%) | |  |

| **Supplementary File 2: Agreement among items of TANGO-GR and medication list in community-dwelling people and rehabilitation centre patients with nocturia** | | | | | | | | | | | |
| --- | --- | --- | --- | --- | --- | --- | --- | --- | --- | --- | --- |
| **POPULATON** | **ITEM** | **T (+)** | **T (+)** | **T (-)** | **T (-)** | **Kappa** | **Po** | **PABAK** | **PI** | **BI** | **Kappamax** |
|  |  | **ML (+)** | **ML (-)** | **ML (+)** | **ML (-)** |  |  |  |  |  |  |
|  |  | **% (a)** | **% (b)** | **% (c)** | **% (d)** |  |  |  |  |  |  |
| Community-dwelling people |  |  |  |  |  |  |  |  |  |  |  |
| n=36 | Q2 vs diuretic drugs | 5.6 | 44.4 | 0.0 | 50.0 | 0.11 | 0.56 | 0.11 | 0.44 | 0.44 | 0.44 |
| n=36 | Q4 vs antihypertensive drugs | 66.7 | 16.7 | 0.0 | 16.7 | 0.57 | 0.83 | 0.67 | 0.50 | 0,17 | 0.88 |
| n=36 | Q6 vs antidiabetic drugs | 19.4 | 2.8 | 0.0 | 77.8 | 0.92 | 0.97 | 0.94 | 0.58 | 0.03 | 1.00 |
| Pehabilitation centre patients |  |  |  |  |  |  |  |  |  |  |  |
| n=41 | Q2 vs diuretic drugs | 19.5 | 29.3 | 9.8 | 41.5 | 0.21 | 0.61 | 0.22 | 0.22 | 0.20 | 0.51 |
| n=50 | Q4 vs antihypertensive drugs | 46.0 | 40.0 | 4.0 | 10.0 | 0.12 | 0.56 | 0.12 | 0.36 | 0.36 | 0.40 |
| n=49 | Q6 vs antidiabetic drugs | 20.4 | 14.3 | 8.2 | 57.1 | 0.48 | 0.78 | 0.55 | 0.37 | 0.06 | 0.75 |
| T: TANGO-GR; ML: medication list; Po: proportion of concordance; PABAK: prevalence-adjusted bias-adjusted Kappa; PI: prevalence index; BI: bias index; | | | | | | | | | | |  |
| Kappamax: maximum attainable Kappa | |  |  |  |  |  |  |  |  |  |  |
| Kappa: measure of agreement between TANGO-GR and medication list, scaled from -1 to 1: score <0 = poor; .01-0.2 = slight; 0.21-0.40 = fair; 0.41-0.60 = moderate; | | | | | | | | | | | |
| 0.61-0.80 = substantial; 0.81-1 = almost perfect agreement (Landis & Koch, 1977) | | | |  |  |  |  |  |  |  |  |

| **Supplementary File 3: Agreement among items of TANGO-GR in test-retest evaluation in community-dwelling people with nocturia** | | | | | | | | | | | |
| --- | --- | --- | --- | --- | --- | --- | --- | --- | --- | --- | --- |
| **POPULATON** | **ITEM** | **T1 (+)** | **T1 (+)** | **T1 (-)** | **T1 (-)** | **Kappa** | **Po** | **PABAK** | **PI** | **BI** | **Kappamax** |
|  |  | **T2 (+)** | **T2 (-)** | **T2 (+)** | **T2 (-)** |  |  |  |  |  |  |
|  |  | **% (a)** | **% (b)** | **% (c)** | **% (d)** |  |  |  |  |  |  |
| n = 37 | Q1 | 24.3 | 0.0 | 0.0 | 75.7 | 1.00 | 1.00 | 1.00 | 0.51 | 0.00 | 1.00 |
| n = 37 | Q2 | 43.2 | 5.4 | 0.0 | 51.4 | 0.89 | 0.95 | 0.89 | 0.08 | 0.05 | 0.89 |
| n = 37 | Q3 | 18.9 | 0.0 | 2.7 | 78.4 | 0.92 | 0.97 | 0.95 | 0.59 | 0.03 | 0.92 |
| n = 37 | Q4 | 81.1 | 0.0 | 0.0 | 18.9 | 1.00 | 1.00 | 1.00 | 0.62 | 0.00 | 1.00 |
| n = 37 | Q5 | 35.1 | 5.4 | 2.7 | 56.8 | 0.83 | 0.92 | 0.84 | 0.22 | 0.03 | 0.94 |
| n = 37 | Q6 | 24.3 | 0.0 | 0.0 | 75.7 | 1.00 | 1.00 | 1.00 | 0.51 | 0.00 | 1.00 |
| n = 37 | Q7 | 10.8 | 8.1 | 0.0 | 81.1 | 0.68 | 0.92 | 0.84 | 0.70 | 0.08 | 0.68 |
| n = 37 | Q8 | 35.1 | 8.1 | 29.7 | 27.0 | 0.27 | 0.62 | 0.24 | 0.08 | 0.22 | 0.58 |
| n = 36 | Q9 | 44.4 | 0.0 | 2.8 | 52.8 | 0.94 | 0.97 | 0.94 | 0.08 | 0.03 | 0.94 |
| n = 37 | Q10 | 40.5 | 0.0 | 2.7 | 56.8 | 0.94 | 0.97 | 0.95 | 0.16 | 0.03 | 0.94 |
| n = 37 | Q11 | 32.4 | 5.4 | 0.0 | 62.2 | 0.88 | 0.95 | 0.89 | 0.30 | 0.05 | 0.88 |
| n = 37 | Q12 | 5.4 | 0.0 | 18.9 | 75.7 | 0.30 | 0.81 | 0.62 | 0.70 | 0.19 | 0.30 |
| n = 34 | Q13 | 47.1 | 0.0 | 5.9 | 47.1 | 0.88 | 0.94 | 0.88 | 0.00 | 0.06 | 0.88 |
| n = 37 | Q14 | 70.3 | 5.4 | 2.7 | 21.6 | 0.79 | 0.92 | 0.84 | 0.49 | 0.03 | 0.93 |
| n = 36 | Q15 | 47.2 | 2.8 | 0.0 | 50.0 | 0.94 | 0.97 | 0.94 | 0.03 | 0.03 | 0.94 |
| n = 37 | Q16 | 43.2 | 5.4 | 0.0 | 51.4 | 0.89 | 0.95 | 0.89 | 0.08 | 0.05 | 0.89 |
| n = 36 | Q17 | 16.7 | 0.0 | 8.3 | 75.0 | 0.75 | 0.92 | 0.83 | 0.58 | 0.08 | 0.75 |
| n = 24 | Q18* | 70.8 | 0.0 | 0.0 | 29.2 | 1.00 | 1.00 | 1.00 | 0.42 | 0.00 | 1.00 |
| n = 33 | Q19 | 18.2 | 6.1 | 0.0 | 75.8 | 0.82 | 0.94 | 0.88 | 0.58 | 0.06 | 0.82 |
| n = 37 | Q20 | 16.2 | 5.4 | 2.7 | 75.7 | 0.75 | 0.92 | 0.84 | 0.59 | 0.03 | 0.92 |
| n = 37 | Q21 | 18.9 | 0.0 | 5.4 | 75.7 | 0.84 | 0.95 | 0.89 | 0.57 | 0.05 | 0.84 |
| n = 37 | Q22 | 32.4 | 0.0 | 5.4 | 62.2 | 0.88 | 0.95 | 0.89 | 0.30 | 0.05 | 0.88 |
| T1: TANGO-GR 1st administration; T2: TANGO-GR 2nd administration; Po: proportion of concordance; PABAK: prevalence-adjusted bias-adjusted Kappa; | | | | | | | | | | |  |
| PI: prevalence index; BI: bias index; Kappamax: maximum attainable Kappa | | | |  |  |  |  |  |  |  |  |
| Kappa: measure of agreement between test and retest questionnaire completion, scaled from -1 to 1: score <0 = poor; 0.01-0.2 = slight; 0.21-0.40 = fair; | | | | | | | | | | |  |
| 0.41-0.60 = moderate; 0.61-0.80 = substantial; 0.81-1 = almost perfect agreement (Landis & Koch, 1977) | | | | | |  |  |  |  |  |  |
| *Statistics only in males |  |  |  |  |  |  |  |  |  |  |  |

| **Supplementary File 4: Agreement among items of TANGO-GR in test-retest evaluation in rehabilitation centre patients with nocturia** | | | | | | | | | | | |
| --- | --- | --- | --- | --- | --- | --- | --- | --- | --- | --- | --- |
| **POPULATON** | **ITEM** | **T1 (+)** | **T1 (+)** | **T1 (-)** | **T1 (-)** | **Kappa** | **Po** | **PABAK** | **PI** | **BI** | **Kappamax** |
|  |  | **T2 (+)** | **T2 (-)** | **T2 (+)** | **T2 (-)** |  |  |  |  |  |  |
|  |  | **% (a)** | **% (b)** | **% (c)** | **% (d)** |  |  |  |  |  |  |
| n = 50 | Q1 | 42.0 | 6.0 | 2.0 | 50.0 | 0.84 | 0.92 | 0.84 | 0.08 | 0.04 | 0.92 |
| n = 41 | Q2 | 48.8 | 0.0 | 4.9 | 46.3 | 0.90 | 0.95 | 0.90 | 0.02 | 0.05 | 0.90 |
| n = 43 | Q3 | 20.9 | 0.0 | 0.0 | 79.1 | 1.00 | 1.00 | 1.00 | 0.58 | 0.00 | 1.00 |
| n = 50 | Q4 | 86.0 | 0.0 | 6.0 | 9.0 | 0.70 | 0.94 | 0.88 | 0.78 | 0.06 | 0.70 |
| n = 49 | Q5 | 32.7 | 14.3 | 2.0 | 51.0 | 0.67 | 0.84 | 0.67 | 0.18 | 0.12 | 0.75 |
| n = 49 | Q6 | 34.7 | 0.0 | 2.0 | 63.3 | 0.96 | 0.98 | 0.96 | 0.29 | 0.02 | 0.96 |
| n = 49 | Q7 | 6.1 | 0.0 | 0.0 | 93.9 | 1.00 | 1.00 | 1.00 | 0.88 | 0.00 | 1.00 |
| n = 45 | Q8 | 37.8 | 8.9 | 15.6 | 37.8 | 0.51 | 0.76 | 0.51 | 0.00 | 0.07 | 0.87 |
| n = 47 | Q9 | 38.3 | 0.0 | 0.0 | 61.7 | 1.00 | 1.00 | 1.00 | 0.23 | 0.00 | 1.00 |
| n = 50 | Q10 | 68.0 | 2.0 | 0.0 | 30.0 | 0.95 | 0.98 | 0.96 | 0.38 | 0.02 | 0.95 |
| n = 48 | Q11 | 39.6 | 2.1 | 2.1 | 56.3 | 0.91 | 0.96 | 0.92 | 0.17 | 0.00 | 1.00 |
| n = 47 | Q12 | 25.5 | 0.0 | 10.6 | 63.8 | 0.75 | 0.89 | 0.79 | 0.38 | 0.11 | 0.75 |
| n = 45 | Q13 | 64.4 | 0.0 | 2.2 | 33.3 | 0.95 | 0.98 | 0.96 | 0.31 | 0.02 | 0.95 |
| n = 50 | Q14 | 68.0 | 4.0 | 4.0 | 24.0 | 0.80 | 0.92 | 0.84 | 0.44 | 0.00 | 1.00 |
| n = 50 | Q15 | 54.0 | 0.0 | 42.0 | 4.0 | 0.92 | 0.96 | 0.92 | 0.12 | 0.04 | 0.92 |
| n = 49 | Q16 | 46.9 | 2.0 | 4.1 | 46.9 | 0.88 | 0.94 | 0.88 | 0.00 | 0.02 | 0.96 |
| n = 50 | Q17 | 30.0 | 2.0 | 2.0 | 66.0 | 0.91 | 0.96 | 0.92 | 0.36 | 0.00 | 1.00 |
| n = 19 | Q18* | 57.9 | 0.0 | 0.0 | 42.1 | 1.00 | 1.00 | 1.00 | 0.16 | 0.00 | 1.00 |
| n = 46 | Q19 | 26.1 | 4.3 | 2.2 | 67.4 | 0.84 | 0.93 | 0.87 | 0.41 | 0.02 | 0.95 |
| n = 49 | Q20 | 2.0 | 0.0 | 0.0 | 98.0 | 1.00 | 1.00 | 1.00 | 0.96 | 0.00 | 1.00 |
| n = 50 | Q21 | 38.0 | 4.0 | 2.0 | 56.0 | 0.88 | 0.94 | 0.88 | 0.18 | 0.02 | 0.96 |
| n = 50 | Q22 | 18.0 | 0.0 | 0.0 | 82.0 | 1.00 | 1.00 | 1.00 | 0.64 | 0.00 | 1.00 |
| T1: TANGO-GR 1st administration; T2: TANGO-GR 2nd administration; Po: proportion of concordance; PABAK: prevalence-adjusted bias-adjusted Kappa; | | | | | | | | | | |  |
| PI: prevalence index; BI: bias index; Kappamax: maximum attainable Kappa; | | | |  |  |  |  |  |  |  |  |
| Kappa: measure of agreement between test and retest questionnaire completion, scaled from -1 to 1: score <0 = poor; 0.01-0.2 = slight; 0.21-0.40 = fair; | | | | | | | | | | |  |
| 0.41-0.60 = moderate; 0.61-0.80 = substantial; 0.81-1 = almost perfect agreement (Landis & Koch, 1977) | | | | | |  |  |  |  |  |  |
| *Statistics only in males |  |  |  |  |  |  |  |  |  |  |  |

**Supplementary File 5: TANGO SF-GR**

Τοποθετήστε Σ για τη σωστή, Λ για τη λανθασμένη απάντηση και αφήστε κενό σε περίπτωση που δε γνωρίζετε την απάντηση

| ΚΑΡΔΙΟ / ΜΕΤΑΒΟΛΙΚΟ | Οι αστράγαλοι, τα πέλματα ή τα πόδια μου πρήζονται κατά τη διάρκεια της ημέρας |  |
| --- | --- | --- |
| Παίρνω διουρητικά χάπια (πχ. Lasix) |  |
| Πάσχω από ασθένεια των νεφρών |  |
| Παίρνω χάπια για τη ρύθμιση της πίεσής μου |  |
| Συχνά νιώθω ζαλάδα όταν στέκομαι όρθιος/α |  |
| Έχω υψηλό σάκχαρο ή πάσχω από σακχαρώδη διαβήτη |  |
| Δυσκολεύομαι να διατηρήσω τα επίπεδα της γλυκόζης του αίματός μου (σάκχαρο) σταθερά |  |

| ΥΠΝΟΣ | Κάθε βράδυ κοιμάμαι 5 ώρες ή λιγότερο |  |
| --- | --- | --- |
| Θα χαρακτήριζα την ποιότητα του ύπνου μου κακή |  |
| Χρειάζομαι περισσότερο από 30 λεπτά για να κοιμηθώ το βράδυ |  |
| Έχω πρόβλημα στο βραδινό ύπνο, εξαιτίας προβλημάτων ούρησης |  |
| Πολλές φορές πονάω τα βράδια |  |
| Μου έχουν πει ότι τη νύχτα ροχαλίζω ή σταματώ να αναπνέω |  |

| ΟΥΡΟΠΟΙΗΤΙΚΟ ΣΥΣΤΗΜΑ | Χρειάζεται να σηκωθώ για να ουρήσω μέσα στις 3 πρώτες ώρες αφότου κοιμηθώ |  |
| --- | --- | --- |
| Τις περισσότερες μέρες αισθάνομαι επιτακτική ανάγκη για ούρηση |  |
| Παρουσιάζω ένα επεισόδιο επιτακτικής ακράτειας ούρων μία φορά την εβδομάδα ή περισσότερο |  |
| Συχνά χρειάζεται να σφιχτώ (πιεστώ) για να ξεκινήσει η ούρηση |  |
| Πάσχω από υπερπλασία προστάτη αδένα (Για τους άνδρες ΜΟΝΟ) |  |

| ΕΥΕΞΙΑ | Γενικά θα έλεγα ότι η υγεία μου δεν είναι καλή |  |
| --- | --- | --- |
| Παρουσιάζω υπνηλία κατά τη διάρκεια της οδήγησης, του φαγητού ή σε κοινωνικές δραστηριότητες |  |
| Είχα μία πτώση κατά τη διάρκεια των τελευταίων 3 μηνών |  |
| Δεν ανυπομονώ για πράγματα που παλιότερα με ευχαριστούσαν |  |
